# Supplementary material for: Facile fabrication of three-dimensional NiCo2O4 hierarchical nanosheet-wire structure for high-performance supercapacitors
Source: Royal Society of Chemistry journal article supplement (doi:10.1039/d4nj01267d), 2024-01-01
Supplement: d4nj01267d1.pdf [file d4nj01267d1.pdf]

## Supplementary material

### Facile fabrication of three-dimensional NiCo<sub>2</sub>O<sub>4</sub> hierarchical nanosheet-wire structure for high-performance supercapacitors

Junyan Huang<sup>a</sup>, Jinjie Zhou<sup>a</sup>, Lijun Liu<sup>b</sup>, Yaxi Zheng<sup>b</sup>, Yin Wang<sup>b</sup>, Xing Chen<sup>\*b</sup>

<sup>a</sup>Department of Safety Supervision and Management, Chongqing Vocational Institute of safety & Technology, Chongqing 404020, China

<sup>b</sup>School of Environmental and Chemical Engineering, Chongqing Three Gorges University, Chongqing 404100, China

\*Corresponding author. Tel: +86 23 58102262; Fax: +86 23 58102262

E-mail address: cxyjxyc@126.com (X. Chen).

#### Electrochemical measurements

The cyclic voltammetry (CV), galvanostatic charging/discharging curves (GCD), and electrochemical impedance spectroscopy (EIS) measurements were performed on a CHI660E electrochemical workstation. In a standard three-electrode setup, the NiCo<sub>2</sub>O<sub>4</sub> HNSW electrode (1 × 1 cm<sup>2</sup>), Hg/HgO electrode, Pt electrode (1 × 1 cm<sup>2</sup>), and 6 M KOH aqueous were employed as working electrode, reference electrode, counter electrode, and electrolyte, respectively. The frequency range of EIS measurement was 0.01~1.0×10<sup>5</sup> Hz with an amplitude of 5 mV. The asymmetric supercapacitor was assembled by using NiCo<sub>2</sub>O<sub>4</sub> HNSW as the positive electrode and activated carbon (AC) as the negative electrode. The NKK membrane was used as the separator and the 6 M KOH solution was used as the electrolyte. The cycling stability was measured in a Land CT3001A battery tester.

#### The equations for the specific capacitance, energy density, power density, and mass ratio

The specific capacity ( $C_s$ , C g<sup>-1</sup>) of the electrode were calculated according to equation S1 to S2. The specific capacitance ( $C_d$ , F g<sup>-1</sup>), Energy density ( $E$ , Wh kg<sup>-1</sup>), and Power density ( $P$ , W kg<sup>-1</sup>) of the assembled asymmetric supercapacitor were calculated according to equation S3 to S5<sup>1,2</sup>.

$$C_s = \frac{2I \int V dt}{m \Delta V} \quad (S1)$$

$$C_d = \frac{I \Delta t}{m_d \Delta V} \quad (S2)$$

$$E = \frac{1}{2 \times 3.6} C(\Delta V)^2 \quad (\text{S3})$$

$$P = \frac{3600E}{\Delta t} \quad (\text{S4})$$

When  $m$  (mg),  $m_d$  (mg),  $v$  (mV s<sup>-1</sup>),  $I$  (A), and  $\Delta V$  (V) represent the mass of the electrode, mass of electroactive materials in the assembled supercapacitor, scan rate, current density, and potential window, respectively.  $\int V dt$  and  $\Delta t$  (s) are the integrated area of the discharge curve and discharge time.

**The probable redox peaks of the chemical transformations of Ni<sup>2+</sup>/Ni<sup>3+</sup> and Co<sup>2+</sup>/Co<sup>3+</sup>/Co<sup>4+</sup>.**

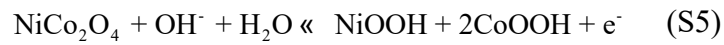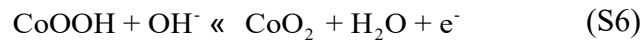

### Charge storage mechanism and the calculation of the capacity contributions

Calculation of the parameter  $b$  <sup>3</sup>.

$$i = av^b \quad (\text{S7})$$

Where  $v$  (mV s<sup>-1</sup>) and  $i$  (A) is the scan rate and current density.

Calculation of the capacitive-controlled and diffusion-controlled contributions <sup>4</sup>:

$$i(V) = k_1v + k_2v^{1/2} \quad (\text{S8})$$

Where  $k_1v$  and  $k_2v^{1/2}$  represent the values of the capacitive-controlled and diffusion-controlled processes.

### Charge balance calculation

The mass ratio of the positive electrode and negative electrode was calculated based on the charge-balance equation.

$$\frac{m_+}{m_-} = \frac{C_- \Delta V_-}{C_+ \Delta V_+} \quad (\text{S9})$$

In equation S6,  $m_+$  and  $m_-$  represent the mass of the positive and negative electrodes, respectively.  $C_+$  and  $C_-$  are the capacitances.  $\Delta V_+$  and  $\Delta V_-$  represent the potential windows, respectively.

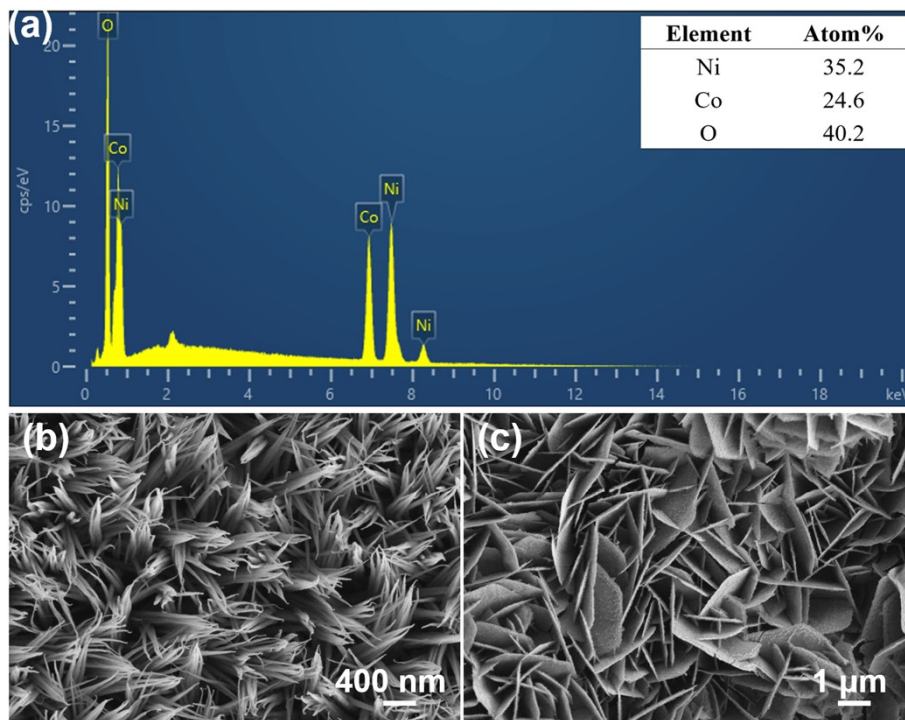

Fig. S1. (a) EDS elemental analysis. The SEM images of (b) NiCo<sub>2</sub>O<sub>4</sub> NWs and (c) NiCo<sub>2</sub>O<sub>4</sub> NSs

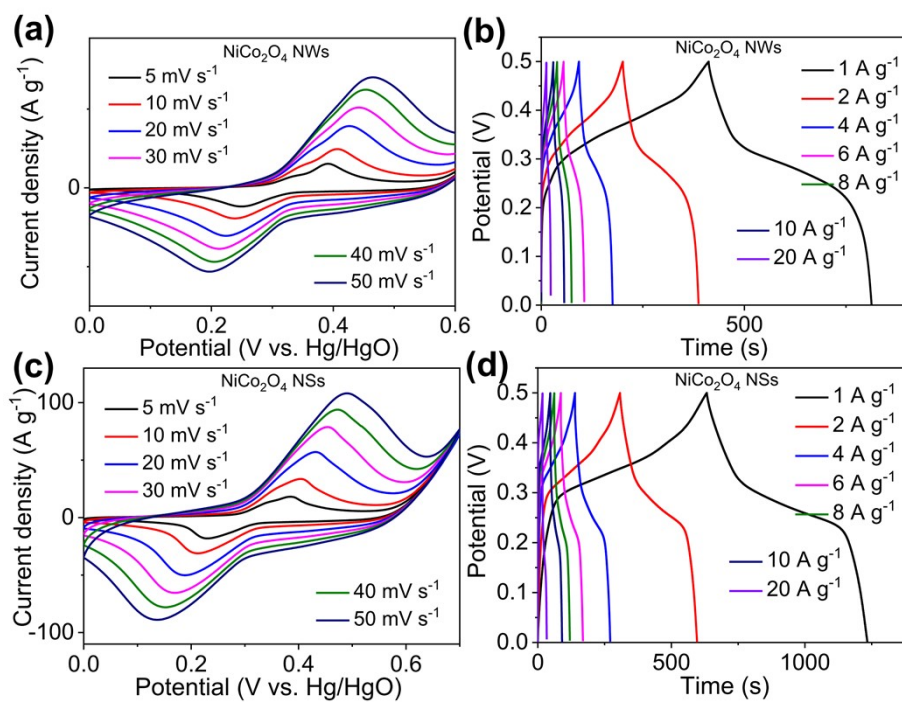

Fig. S2. CV and GCD curves of the (a, b) NiCo<sub>2</sub>O<sub>4</sub> NWs and (c, d) NiCo<sub>2</sub>O<sub>4</sub> NSs at different scan rates and current densities.

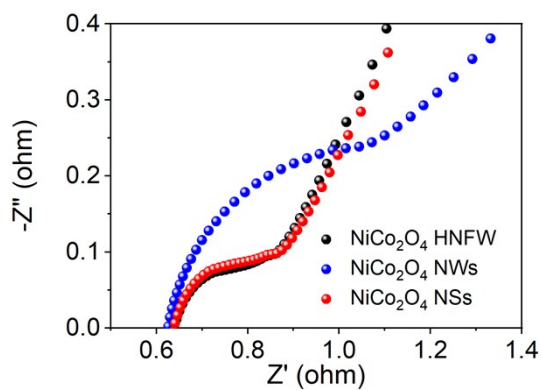

Fig. S3. The enlarged Nyquist plot.

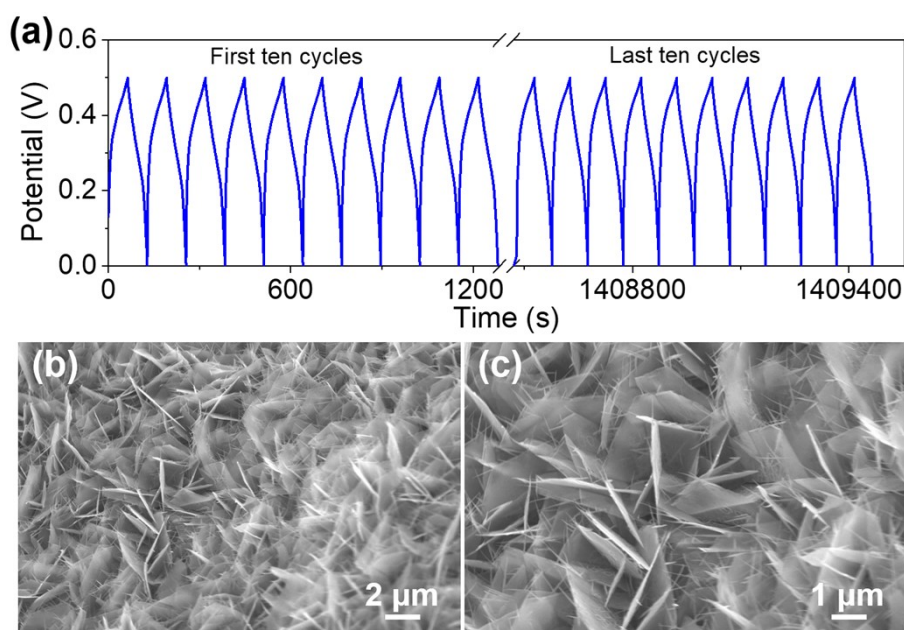

Fig. S4. (a) GCD curves of the first ten cycles and the last ten cycles. (b, c) SEM images of the  $\text{NiCo}_2\text{O}_4$  HNSW electrode after 12,000 charge-discharge cycles.

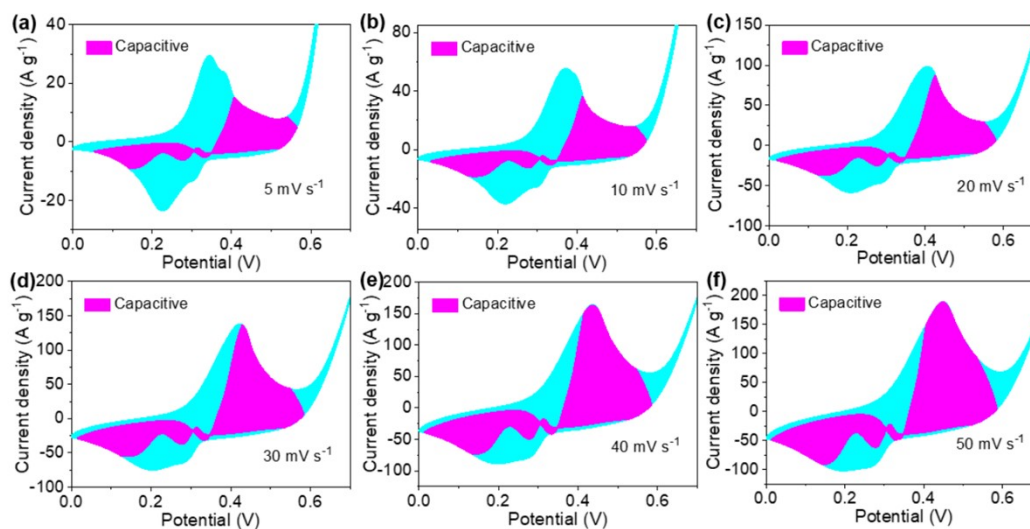

Fig. S5. CV curves of the capacitive and diffusion-controlled processes of the  $\text{NiCo}_2\text{O}_4$  HNSW

electrode at (a) 5, (b) 10, (c) 20, (d)30, (e) 40, and (f) 50  $\text{mV s}^{-1}$ .

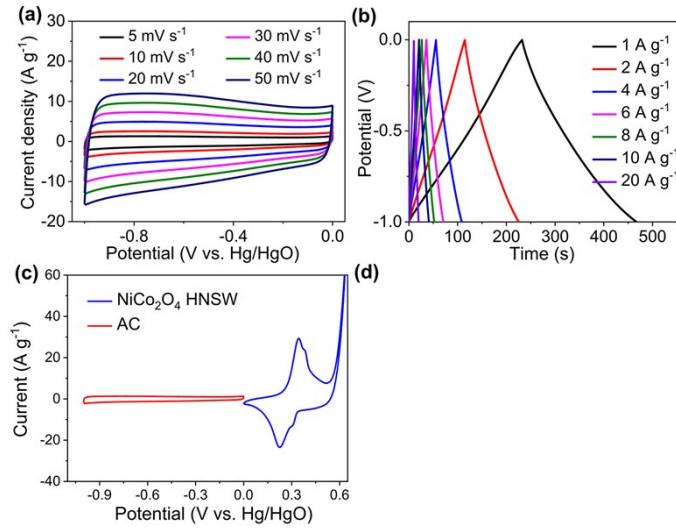

Fig. S6. (a, b) The CV and GCD curves of AC at different scan rates and current densities. (c) CV curves for  $\text{NiCo}_2\text{O}_4$  HNSW and AC electrodes.

Table S1. The specific capacities ( $\text{C g}^{-1}$ ) of  $\text{NiCo}_2\text{O}_4$  HNSW,  $\text{NiCo}_2\text{O}_4$  NWs, and  $\text{NiCo}_2\text{O}_4$  NSs.

| Material                       | 1 $\text{A g}^{-1}$ | 2 $\text{A g}^{-1}$ | 4 $\text{A g}^{-1}$ | 6 $\text{A g}^{-1}$ | 8 $\text{A g}^{-1}$ | 10 $\text{A g}^{-1}$ | 20 $\text{A g}^{-1}$ |
|--------------------------------|---------------------|---------------------|---------------------|---------------------|---------------------|----------------------|----------------------|
| $\text{NiCo}_2\text{O}_4$ HNSW | 992.8               | 964.8               | 918.4               | 873.6               | 841.6               | 812.0                | 696.0                |
| $\text{NiCo}_2\text{O}_4$ NWs  | 451.8               | 416.2               | 365.7               | 335.3               | 310.3               | 289.6                | 220.1                |
| $\text{NiCo}_2\text{O}_4$ NSs  | 664.9               | 636.0               | 534.3               | 482.1               | 434.2               | 391.4                | 210.4                |

Table S2. Fitted results of the EIS data for  $\text{NiCo}_2\text{O}_4$  HNSW,  $\text{NiCo}_2\text{O}_4$  NWs, and  $\text{NiCo}_2\text{O}_4$  NSs samples

| Material                       | $R_s$<br>( $\Omega$ ) | CPE1-T<br>(mF) | CPE1-P<br>(F) | $R_{ct}$<br>( $\Omega$ ) | W1-R<br>( $\Omega$ ) | W1-T<br>( $\Omega$ ) | W1-P<br>( $\Omega$ ) | CPE2-T<br>(F) | CPE2-P<br>(F) |
|--------------------------------|-----------------------|----------------|---------------|--------------------------|----------------------|----------------------|----------------------|---------------|---------------|
| $\text{NiCo}_2\text{O}_4$ HNSW | 0.65                  | 0.077          | 1.2           | 0.014                    | 0.55                 | 0.047                | 0.28                 | 0.27          | 1.0           |
| $\text{NiCo}_2\text{O}_4$ NWs  | 0.63                  | 2.2            | 0.90          | 0.31                     | 4.9                  | 6.2                  | 0.37                 | 0.24          | 0.79          |
| $\text{NiCo}_2\text{O}_4$ NSs  | 0.67                  | 0.13           | 1.2           | 0.018                    | 0.41                 | 0.030                | 0.25                 | 0.30          | 0.95          |

Table S3. Comparison of specific capacitances with reported NiCo<sub>2</sub>O<sub>4</sub>-based electrode materials.

| Material                                                                       | Electrolyte | Capacitance retention                         | Specific capacitance (F g <sup>-1</sup> ) at 1 A g <sup>-1</sup> | Reference        |
|--------------------------------------------------------------------------------|-------------|-----------------------------------------------|------------------------------------------------------------------|------------------|
| NiCo <sub>2</sub> O <sub>4</sub> @MnMoO <sub>4</sub> core-shell flowers        | 3 M KOH     | 87.8% (1 A g <sup>-1</sup> , 5000 cycles)     | 1118                                                             | 5                |
| NiCo <sub>2</sub> O <sub>4</sub> Nano flowers                                  | 6 M KOH     | -                                             | 1030                                                             | 6                |
| NiCo <sub>2</sub> O <sub>4</sub> Nanosheet                                     | 6 M KOH     | 90.9% (10 A g <sup>-1</sup> , 5000 cycles)    | 2018                                                             | 7                |
| NiCo <sub>2</sub> O <sub>4</sub> hexagonal nanostructures                      | 2 M KOH     | 98.0% (10 A g <sup>-1</sup> , 2000 cycles)    | 1525                                                             | 8                |
| NiCo <sub>2</sub> O <sub>4</sub> @NiWO <sub>4</sub> Core-shell Nanowire Arrays | 6 M KOH     | 87.6% (5 A g <sup>-1</sup> , 6000 cycles)     | 1384                                                             | 9                |
| NiCo <sub>2</sub> O <sub>4</sub> Nanosheets                                    | 2 M KOH     | 99.0 % (10 A g <sup>-1</sup> , 3000 cycles)   | 1472                                                             | 10               |
| NiCo <sub>2</sub> O <sub>4</sub> Nanobelt/Graphene                             | 6 M KOH     | 98.6 % (10 A g <sup>-1</sup> , 3000 cycles)   | 1073                                                             | 11               |
| Mesoporous NiCo <sub>2</sub> O <sub>4</sub> nanorods                           | 2 M KOH     | 84.3% (5 A g <sup>-1</sup> , 5000 cycles)     | 790                                                              | 12               |
| NNCO-1                                                                         | 3 M KOH     | 97.0% (2 A g <sup>-1</sup> , 2000 cycles)     | 503.5 C g <sup>-1</sup>                                          | 13               |
| 2D leaf-like NiCo <sub>2</sub> O <sub>4</sub> @CNPs                            | 6 M KOH     | 97.3 % (2 A g <sup>-1</sup> , 2000 cycles)    | 1265                                                             | 14               |
| NiCo <sub>2</sub> O <sub>4</sub> HNSW                                          | 6 M KOH     | 77.0 % (10 A g <sup>-1</sup> , 12,000 cycles) | 1986<br>(992.8 C g <sup>-1</sup> )                               | <b>This work</b> |

Table S4. The energy densities, power densities, and specific capacitances of the HSC device at different current densities.

| Material                                  | 1 A g <sup>-1</sup> | 2 A g <sup>-1</sup> | 4 A g <sup>-1</sup> | 6 A g <sup>-1</sup> | 8 A g <sup>-1</sup> | 10 A g <sup>-1</sup> | 20 A g <sup>-1</sup> |
|-------------------------------------------|---------------------|---------------------|---------------------|---------------------|---------------------|----------------------|----------------------|
| Specific capacitance (F g <sup>-1</sup> ) | 124.6               | 109.1               | 93.4                | 83.4                | 76.9                | 71.8                 | 50.1                 |
| Power density (W kg <sup>-1</sup> )       | 800                 | 1600                | 3200                | 4800                | 6400                | 8000                 | 16000                |
| Energy density (Wh Kg <sup>-1</sup> )     | 44.3                | 38.8                | 33.2                | 29.7                | 27.3                | 25.5                 | 17.8                 |

## References

- 1 D. K. Kim, N. D. Kim, S. K. Park, K. D. Seong, M. Hwang, N. H. You and Y. Z. Piao, *J. Power Sources*, 2018, **380**, 55-63.
- 2 B. Huang, W. Wang, T. Pu, J. Li, C. Zhao, L. Xie and L. Chen, *Chem. Eng. J.*, 2019, **375**, 121969.
- 3 S. Shahrokhian and L. Naderi, *J. Phys. Chem. C*, 2019, **123**, 21353-21366.
- 4 F. Hekmat, H. Hosseini, S. Shahrokhian and H. E. Unalan, *Energy Storage Mater.*, 2020, **25**, 621-635.
- 5 Z. X. Gu and X. J. Zhang, *J. Mater. Chem. A*, 2016, **4**, 8249-8254.
- 6 R. Packiaraj, P. Devendran, K. S. Venkatesh, K. Mahendraprabhu and N. Nallamuthu, *J. Energy Storage*, 2021, **34**, 102029.
- 7 X. Zhang, F. Yang, H. Chen, K. Wang, J. Chen, Y. Wang and S. Song, *Small*, 2020, **16**, 2004188.
- 8 J. Bhagwan, G. Nagaraju, B. Ramulu, S. C. Sekhar and J. S. Yu, *Electrochim. Acta*, 2019, **299**, 509-517.

- 9 S. Chen, G. Yang, Y. Jia and H. Zheng, *J. Mater. Chem. A*, 2017, **5**, 1028-1034.
- 10 J. Wu, P. Guo, R. Mi, X. Liu, H. Zhang, J. Mei, H. Liu, W.-M. Lau and L.-M. Liu, *J. Mater. Chem. A*, 2015, **3**, 15331-15338.
- 11 J. Xu, L. Li, P. Gao, L. Yu, Y. Chen, P. Yang, S. Gai and P. Yang, *Electrochim. Acta*, 2015, **166**, 206-214.
- 12 J. Acharya, T. H. Ko, M.-K. Seo, M.-S. Khil, H.-Y. Kim and B.-S. Kim, *J. Colloid. Interf. Sci.*, 2020, **564**, 65-76.
- 13 D. T. Phat, P. M. Thao, N. Van Nghia, L. T. Son, T. V. Thu, N. T. Lan, N. Q. Quyen, N. Van Ky and T. Van Nguyen, *J. Energy Storage*, 2021, **33**, 102030.
- 14 H. Guan, N. Wei, M. Yang, J. Cheng, W. He and B. Zhang, *Vacuum*, 2023, **209**, 111812.
